# Supplementary material for: Spine biomechanical testing methodologies: The controversy of consensus vs scientific evidence
Source: PubMed Central journal article supplement (PMC7984003; doi:10.1002/jsp2.1138), 2021-01-05
Supplement: JSP2-4-e1138-s001.pdf [file JSP2-4-e1138-s001.pdf]

## Supplemental Material S2: List of Survey Responders

| Surname       | First Name | Affiliation                                                   | Email                           |
|---------------|------------|---------------------------------------------------------------|---------------------------------|
| Anderson      | Dennis E.  | Harvard Medical School / Beth Israel Deaconess Medical Center | danders7@bidmc.harvard.edu      |
| Andersson     | Gunnar     | Rush University Medical Center                                | Gunnar_andersson@rush.edu       |
| Bowden        | Anton      | Brigham Young University                                      | abowden@byu.edu                 |
| Buckley       | Conor      | Trinity College Dublin Ireland                                | conor.buckley@tcd.ie            |
| Caprara       | Sebastiano | ETH Zurich                                                    | sebastiano.caprara@hest.ethz.ch |
| Chiba         | Kazuhiro   | National Defense Medical College                              | kchiba5726@gmail.com            |
| Cholewicki    | Jacek      | Michigan State University Center for Orthopedic Research      | cholewic@msu.edu                |
| Colbrunn      | Robb       | Cleveland Clinic                                              | colbrur@ccf.org                 |
| Costi         | John J.    | Flinders University                                           | john.costi@flinders.edu.au      |
| Cristofolini  | Luca       | Alma Mater Studiorum - Università di Bologna                  | luca.cristofolini@unibo.it      |
| Diwan         | Ashish     | University of New South Wales                                 | A.diwan@unsw.edu.au             |
| Dvorak        | Jiri       | Schulthess Clinic Zurich                                      | jiri@dvorakmedical.com          |
| Ellingson     | Arin       | University of Minnesota                                       | ellin224@umn.edu                |
| El-Rich       | Marwan     | Khalifa University                                            | marwan.elrich@ku.ac.ae          |
| Espinoza      | Alejandro  | Rush University Medical Center                                | Alejandro_Espinoza@rush.edu     |
| Farahpour     | Nader      | Bu Ali Sina University                                        | naderfarahpour1@gmail.com       |
| Ferguson      | Stephen    | ERH Zurich                                                    | fstephen@ethz.ch                |
| Fields        | Aaron      | University of California, San Francisco                       | aaron.fields@ucsf.edu           |
| Gadomski      | Ben        | Colorado State University                                     | ben.gadomski@colostate.edu      |
| Gardner-Morse | Mack       | University of Vermont                                         | mack.gardner-morse@uvm.edu      |
| Gill          | Kevin      | UT Southwestern Medical Center-Dallas                         | kevin.gill@utsouthwestern.edu   |
| Goel          | Vijay      | University of Toledo                                          | Vijay.Goel@utoledo.edu          |
| Grad          | Sibylle    | AO Research Institute Davos                                   | sibylle.grad@aofoundation.org   |
| Gregory       | Diane      | Wilfrid Laurier University                                    | dgregory@wlu.ca                 |
| Higashino     | Kosaku     | Shikoku Medical Center for Children and Adults                | kosahigasino@gmail.com          |
| Holguin       | Nilsson    | IUPUI                                                         | nholguin@iupui.edu              |
| Holsgrove     | Timothy    | University of Exeter                                          | t.holsgrove@exeter.ac.uk        |
| Hoon          | Jeon Chang | AJOU Univ. Medical Center                                     | chjeon@ajou.ac.kr               |
| Hukins        | David      |                                                               | david_hukins@yahoo.co.uk        |
| Iatridis      | James C.   | Icahn School of Medicine at Mount Sinai                       | james.iatridis@mssm.edu         |
| Kawakami      | Mamoru     | Wakayama Medical University Kihoku Hospital                   | kawakami@wakayama-med.ac.jp     |
| Kennedy       | David J.   | Vanderbilt University Medical Center                          | david.j.kennedy@vumc.org        |

|               |              |                                                             |                                  |
|---------------|--------------|-------------------------------------------------------------|----------------------------------|
| Kim           | Joochan      | Korea University                                            | nskjh94@korea.ac.kr              |
| La Barbera    | Luigi        | Politecnico di Milano. 2: Polytechnique Montréal.           | luigi.labarbera@polimi.it        |
| Ledet         | Eric         | Rensselaer Polytechnic Institute                            | ledete@rpi.edu                   |
| Liebsch       | Christian    | Ulm University                                              | christian.liebsch@uni-ulm.de     |
| Macedo        | Luciana      | McMaster University                                         | macedol@mcmaster.ca              |
| Mannen        | Erin         | University of Arkansas for Medical Sciences                 | emannen@uams.edu                 |
| Martin        | John         | Duke University                                             | jtm56@duke.edu                   |
| Mauck         | Robert L.    | University of Pennsylvania                                  | lemauck@mail.med.upenn.edu       |
| Newell        | Nicolas      | Imperial College London                                     | n.newell09@imperial.ac.uk        |
| O'Connell     | Grace        | University of California - Berkeley                         | g.oconnell@berkeley.edu          |
| Palanca       | Marco        | University of Sheffield                                     | m.palanca@sheffield.ac.uk        |
| Punt          | Michiel      |                                                             | michiel.punt@hu.nl               |
| Puttlitz      | Christian    | Colorado State University                                   | christian.puttlitz@colostate.edu |
| Ramos Pascual | Sonia        | University of Bath                                          | soniaramospascual@gmail.com      |
| Raphaël       | Vialle       | Armand Trousseau Hospital                                   | raphael.vialle@aphp.fr           |
| Russo         | Michael P.   | Flinders University                                         | Michael.russo@flinders.edu.au    |
| Sakai         | Toshinori    | Tokushima university                                        | norinoridowluck@yahoo.co.jp      |
| Shirado       | Osamu        | AMEC at Fukushima Medical University                        | oshirado@gmail.com               |
| Sloan         | Stephen      | Cornell University                                          | srs387@cornell.edu               |
| Smit          | Theodoor H.  | Amsterdam UMC                                               | th.smit@amsterdamumc.nl          |
| Stokes        | Ian          | University of Vermont                                       | ian.stokes@uvm.edu               |
| Stone         | Laura S .    | McGill University                                           | laura.s.stone@mcgill.ca          |
| Suzuki        | Miyako       |                                                             | miyakosuzuki170@chiba-u.jp       |
| Turner        | Alex         |                                                             | aturner@atecspine.com            |
| Vadala        | Gianluca     | Campus Bio-Medico University of Rome                        | G.vadala@gmail.com               |
| Walsh         | William      | UNSW Sydney                                                 | w.walsh@unsw.edu.au              |
| Wilke         | Hans-Joachim | Ulm University                                              | hans-joachim.wilke@uni-ulm.de    |
| Yamada        | Kentaro      | Fuchu Hospital                                              | yamachen@msic.med.osaka-cu.ac.jp |
| Yoon          | Tim          | Emory                                                       | styoona@emory.edu                |
| Yurube        | Takashi      | Kobe University Graduate School of Medicine                 | takayuru-0215@umin.ac.jp         |
| Zander        | Thomas       | Charité - Universitätsmedizin Berlin, Julius Wolff Institut | thomas.zander@charite.de         |
